# Supplementary material
Source: publisher site journal article supplement (https://www.dovepress.com/article/365695)
Supplement: Supplementary file 1 [file get_supplementary_file.php]

**Table S1** The Characteristics of LUAD and LUSC patients from the TCGA database

| <b>Dataset</b>       | <b>LUAD</b> | <b>LUSC</b> |
|----------------------|-------------|-------------|
| Total patients       | 477         | 467         |
| Age at diagnosis (y) | 66(33-88)   | 66(39-85)   |
| Gender               |             |             |
| Male                 | 220         | 346         |
| Female               | 257         | 121         |
| TNM stage            |             |             |
| I                    | 253         | 222         |
| II                   | 113         | 154         |
| III                  | 78          | 81          |
| IV                   | 25          | 6           |
| unknow               | 8           | 4           |
| T stage              |             |             |
| T1                   | 159         | 104         |
| T2                   | 254         | 274         |
| T3                   | 43          | 68          |
| T4                   | 18          | 21          |
| TX                   | 3           | -           |
| N stage              |             |             |
| N0                   | 307         | 295         |
| N1                   | 90          | 124         |
| N2                   | 67          | 39          |
| N3                   | 2           | 5           |
| NX and unknown       | 11          | 4           |
| M stage              |             |             |
| M0                   | 313         | 387         |
| M1                   | 24          | 6           |
| MX and unknown       | 140         | 74          |
| Survival status      |             |             |
| Dead                 | 157         | 181         |
| Alive                | 320         | 286         |

**Table S2** Characteristics of LUAD and LUSC patients from GEO database

| Dataset              | GSE31210  | GSE30219  | GSE30219  | GSE72094  |
|----------------------|-----------|-----------|-----------|-----------|
| Platform             | GPL570    | GPL570    | GPL570    | GPL15048  |
| histology            | LUAD      | LUAD      | LUSC      | LUAD      |
| Total patients       | 204       | 83        | 61        | 386       |
| Age at diagnosis (y) | 60(30-76) | 60(44-86) | 63(46-82) | 66(38-89) |
| Gender               |           |           |           |           |
| Male                 | 95        | 65        | 56        | 168       |
| Female               | 109       | 18        | 5         | 218       |
| Smoking              |           |           |           |           |
| Never                | 105       | -         | -         | 95        |
| Ever                 | 99        | -         | -         | 291       |
| TNM stage            |           |           |           |           |
| I                    | 162       | -         | -         | 246       |
| II                   | 42        | -         | -         | 65        |
| III                  | -         | -         | -         | 56        |
| IV+unknow            | -         | -         | -         | 14+5      |
| T stage              |           |           |           |           |
| T1                   | -         | 69        | 49        | -         |
| T2                   | -         | 12        | 6         | -         |
| T3                   | -         | 2         | 4         | -         |
| T4                   | -         | -         | 2         | -         |
| N stage              |           |           |           |           |
| N0                   | -         | 80        | 52        | -         |
| N1                   | -         | 3         | 9         | -         |
| Relapse              |           |           |           |           |
| Yes                  | 54        | 27        | 38        | -         |
| No                   | 150       | 56        | 22        | -         |
| NA                   | -         | -         | 1         | -         |
| Survival status      |           |           |           |           |
| Dead                 | 30        | 43        | 43        | 109       |
| Alive                | 174       | 40        | 18        | 277       |

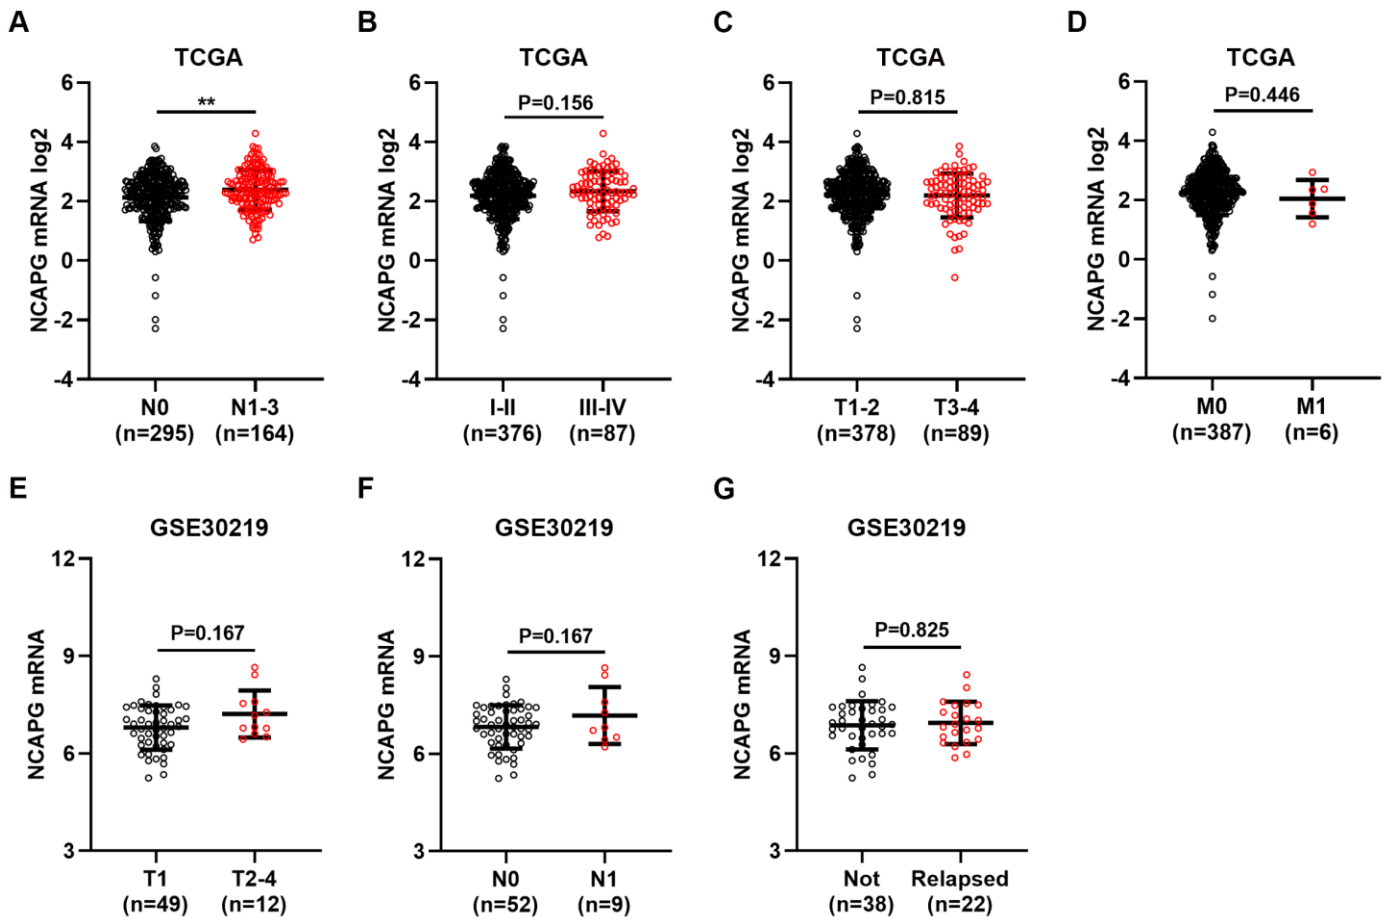

**Figure S1** Correlation between NCAPG mRNA expression and clinicopathologic characteristics of LUSC patients. (A-D) The association of NCAPG mRNA with N stage, TNM stage, T stage and M stage of LUSC in TCGA dataset. (E-G) Association of NCAPG mRNA expression with T stage, N stage and relapse status of LUSC patients in GSE30219 dataset. \*\*P < 0.01.

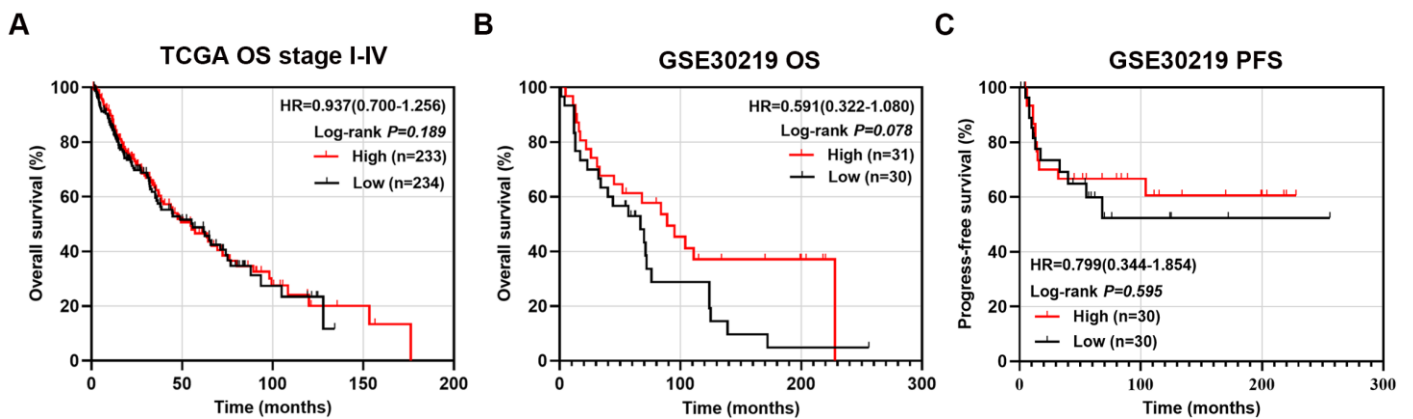

**Figure S2** Impact of NCAPG on survival of patients with LUSC. (A) K-M curve showing the impact of NCAPG on the OS of TCGA-LUSC patients. (B-C) K-M curves indicating the effect of NCAPG on OS and PFS of GSE30219-LUSC patients.

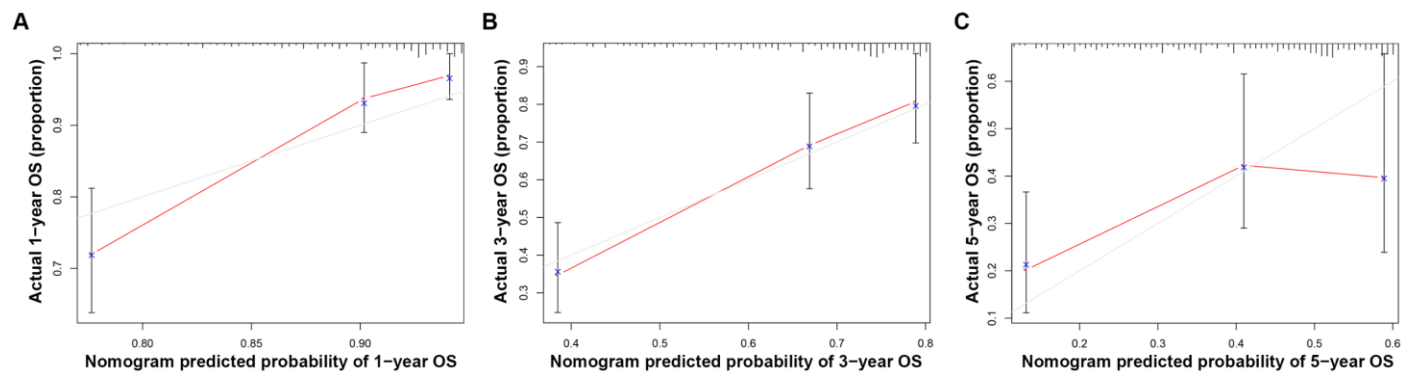

**Figure S3** Calibration curve of the nomogram for patients with LUAD. The calibration curve showing the OS at one year (A), three years (B), and five years (C).

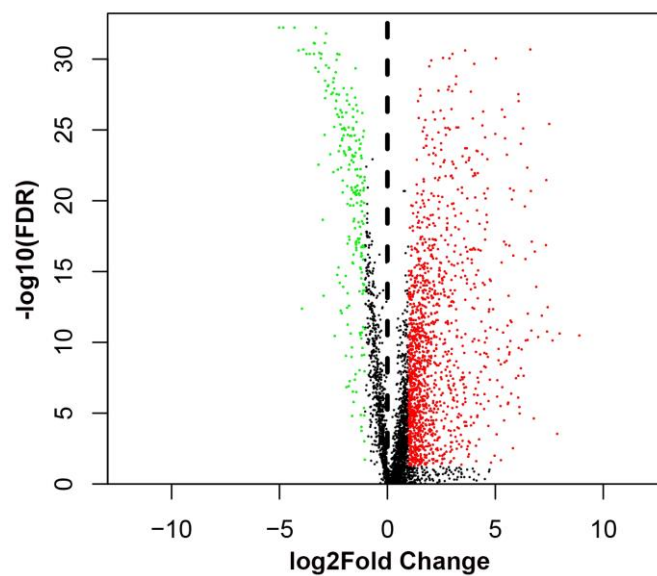

**Figure S4** The volcano plot of DElncRNAs.

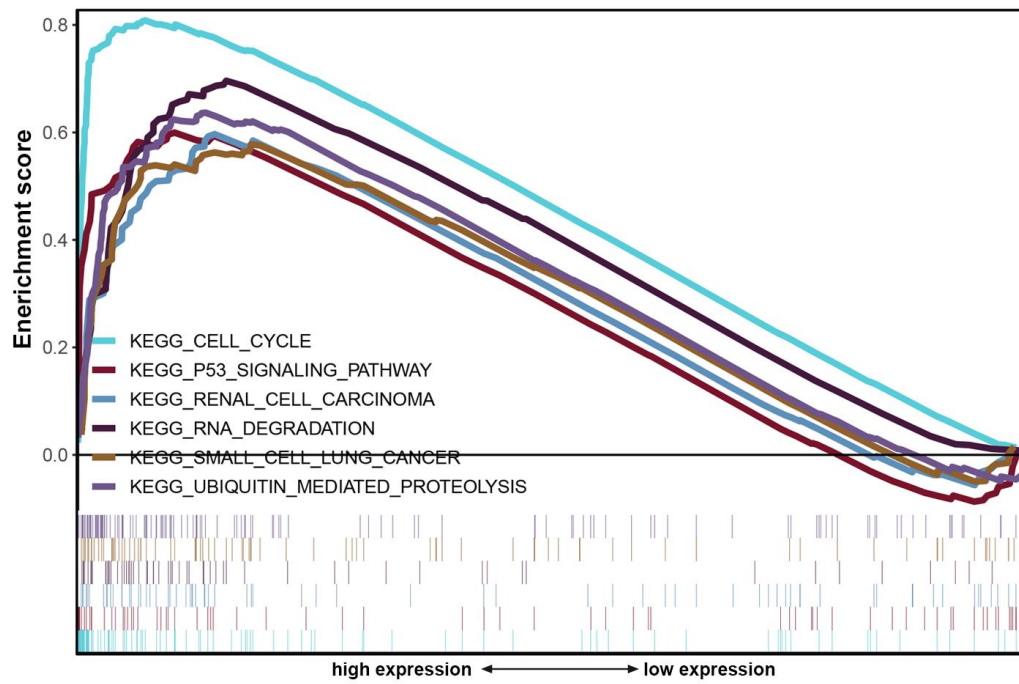

**Figure S5** Plots showing GSEA results for LncRAN AC099850.3.
